# Supplementary material
Source: Research Square preprint supplement (doi:10.21203/rs.3.rs-9759255/v1)
Supplement: Supplementary file 2 [file fc1be791db9ad54c85c2a2c8.docx]

**Scheme 1.** Synthesis methods for [11C]phosgene
